# Supplementary material
Source: publisher site journal article supplement (https://www.dovepress.com/article/347293)
Supplement: Supplementary file 1 [file get_supplementary_file.php]

THE SUPPLEMENTARY INFORMATION FOR THE RESEARCH ARTICLE TITLED “MicroRNA miR-24-3p mediates the negative regulation of lipopolysaccharide-induced endometrial inflammatory response by targeting TNF receptor-associated factor 6 (TRAF6).”

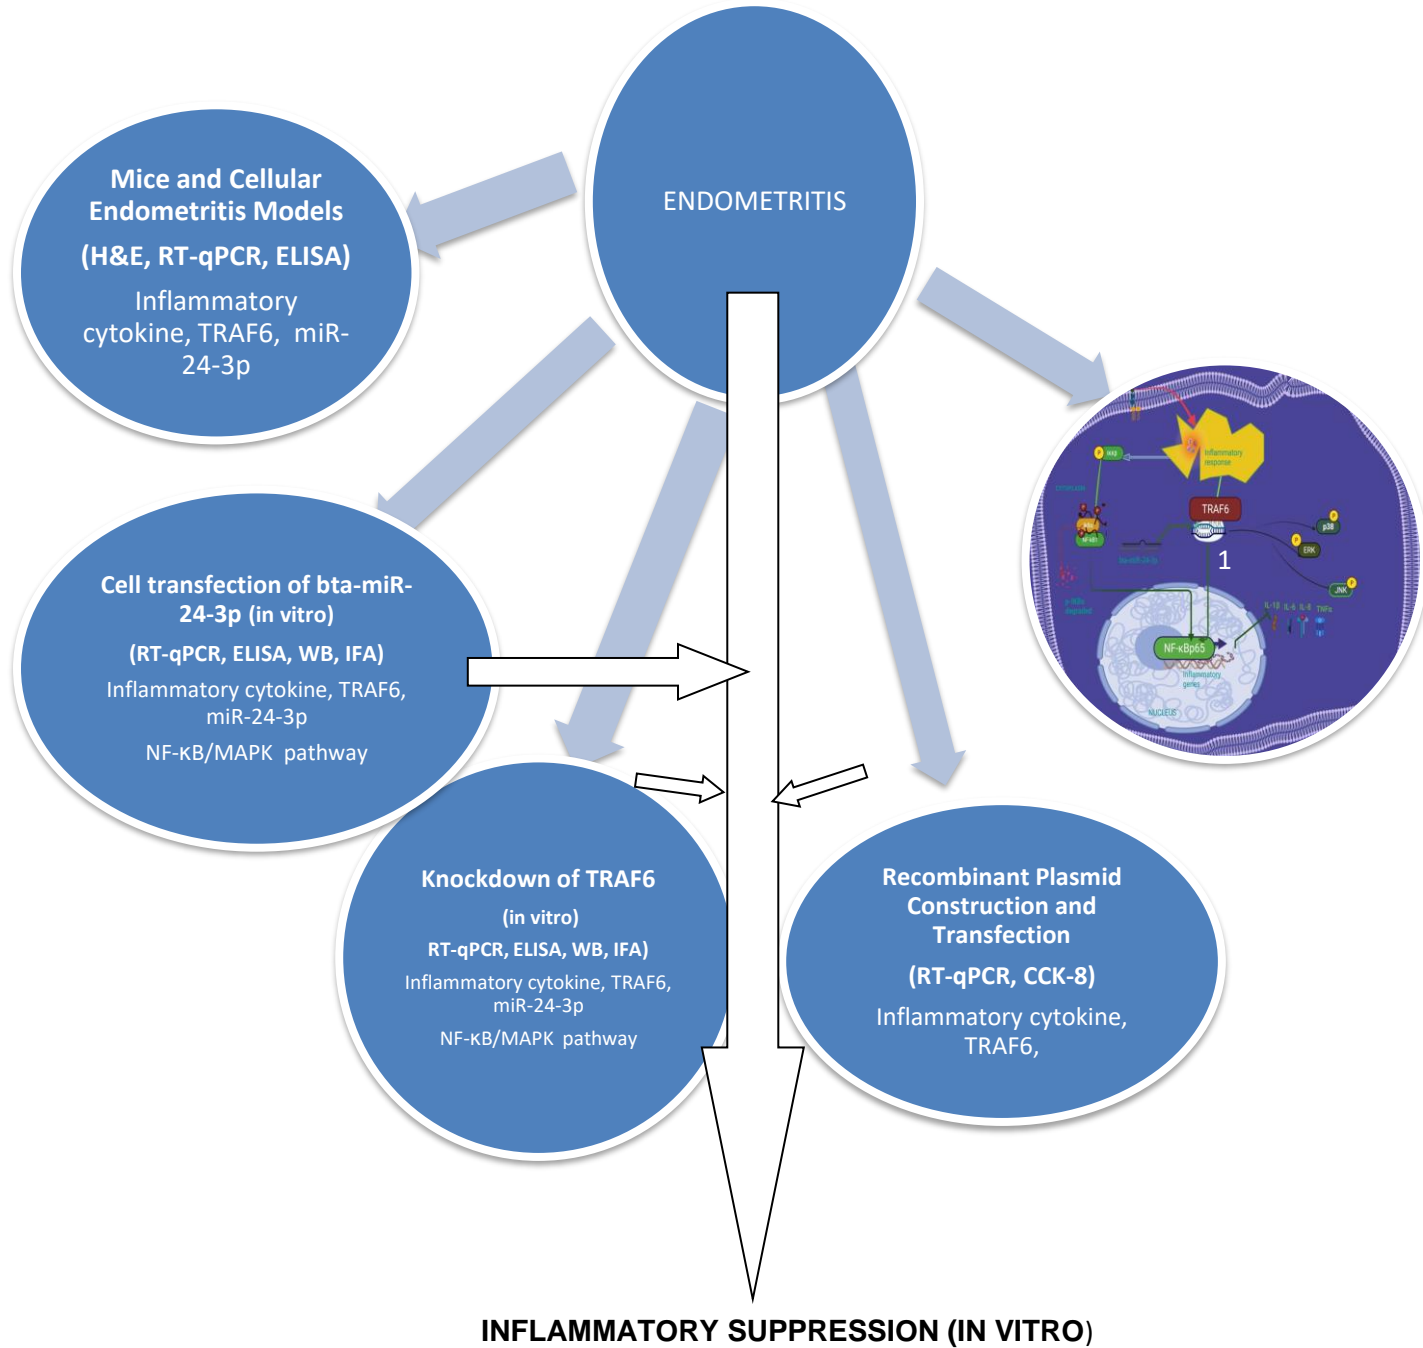

Supplementary Figure 1; showing the research outflow for the experimental work.

## RNA QUALITY OF THE RESEARCH

TableS1: showing the RNA quality of LPS-stimulated mice uterine tissue.

| PROTOCOL | A260/280 | Concentration (ng/ $\mu$ L) |
|----------|----------|-----------------------------|
| 0        | 1.829    | 588.32                      |
| 0        | 1.835    | 562.44                      |
| 0        | 1.841    | 625.34                      |
| LPS      | 1.877    | 586.24                      |
| LPS      | 1.921    | 564.12                      |
| LPS      | 1.945    | 589.40                      |

TableS2: showing the RNA quality of the LPS-stimulated BEECs experiment.

| PROTOCOL         | A260/280 | Concentration (ng/ $\mu$ L) |
|------------------|----------|-----------------------------|
| 0                | 1.850    | 572.40                      |
| 0                | 1.885    | 555.67                      |
| 0                | 1.922    | 614.48                      |
| 3 $\mu$ g/ml LPS | 1.861    | 578.32                      |
| 3 $\mu$ g/ml LPS | 1.889    | 535.28                      |
| 3 $\mu$ g/ml LPS | 1.848    | 571.00                      |

Supplementary Table3: showing the RNA quality of transfections of mimic, siRNA and pcDNA 3.1(+) *TRAF6* experiment

| PROTOCOL                  | A260/280 | Concentration (ng/ $\mu$ L) |
|---------------------------|----------|-----------------------------|
| Bta- miR-24-3p mimic      | 1.829    | 588.32                      |
| Bta- miR-24-3p mimic      | 1.843    | 567.14                      |
| Bta- miR-24-3p mimic      | 1.821    | 635.34                      |
| Bta- miR-24-3p mimic +LPS | 1.918    | 789.60                      |
| Bta- miR-24-3p mimic +LPS | 1.929    | 812.41                      |
| Bta- miR-24-3p mimic +LPS | 1.945    | 834.16                      |
| Bta- miR-24-3p mimicNC    | 1.877    | 625.34                      |
| Bta- miR-24-3p mimicNC    | 1.905    | 674.32                      |
| Bta- miR-24-3p mimicNC    | 1.834    | 586.24                      |
| Bta-miR-24-3pmimicNC+LPS  | 1.863    | 612.48                      |
| Bta-miR-24-3pmimicNC+LPS  | 1.902    | 639.40                      |
| Bta-miR-24-3pmimicNC+LPS  | 1.886    | 614.04                      |
| Si- <i>TRAF6</i>          | 1.827    | 584.12                      |
| Si- <i>TRAF6</i>          | 1.911    | 605.74                      |
| Si- <i>TRAF6</i>          | 1.865    | 594.82                      |

|                                      |       |        |
|--------------------------------------|-------|--------|
| Si- <i>TRAF6</i> + LPS               | 1.884 | 608.16 |
| Si- <i>TRAF6</i> + LPS               | 1.876 | 625.04 |
| Si- <i>TRAF6</i> + LPS               | 1.821 | 589.40 |
| Si-NC                                | 1.847 | 602.54 |
| Si-NC                                | 1.932 | 687.12 |
| Si-NC                                | 1.883 | 622.34 |
| Si-NC+ LPS                           | 1.876 | 568.62 |
| Si-NC+ LPS                           | 1.862 | 575.24 |
| Si-NC+ LPS                           | 1.908 | 643.24 |
| pcDNA3.1(+) <i>TRAF6</i>             | 1.832 | 621.24 |
| pcDNA3.1(+) <i>TRAF6</i>             | 1.812 | 617.14 |
| pcDNA3.1(+) <i>TRAF6</i>             | 1.850 | 636.64 |
| pcDNA3.1(+) <i>TRAF6</i> + LPS       | 1.932 | 732.34 |
| pcDNA3.1(+) <i>TRAF6</i> + LPS       | 1.887 | 712.41 |
| pcDNA3.1(+) <i>TRAF6</i> + LPS       | 1.915 | 814.14 |
| pcDNA3.1(+)                          | 1.913 | 842.72 |
| pcDNA3.1(+)                          | 1.905 | 674.82 |
| pcDNA3.1(+)                          | 1.843 | 686.46 |
| pcDNA3.1(+)+ LPS                     | 1.932 | 812.48 |
| pcDNA3.1(+)+ LPS                     | 1.928 | 839.40 |
| pcDNA3.1(+)+ LPS                     | 1.880 | 674.74 |
| pcDNA3.1(+) <i>TRAF6</i> + miR-24-3p | 1.965 | 838.46 |
| pcDNA3.1(+) <i>TRAF6</i> + miR-24-3p | 1.873 | 628.74 |
| pcDNA3.1(+) <i>TRAF6</i> + miR-24-3p | 1.889 | 778.36 |
